# Supplementary material
Source: HighWire-hosted journal article supplement (https://rmdopen.bmj.com/content/5/1/e000878)
Supplement: inline-supplementary-material-1 [file inline-supplementary-material-1.docx]

| **Supplemental Table1.** Chromosomal abnormalities and their ICD-9 codes |
| --- |
| 758 Chromosomal anomalies |
| 758.0 Down’s syndrome |
| 758.1 Patau’s syndrome |
| 758.2 Edwards’s syndrome |
| 758.3 Autosomal deletion syndromes |
| 758.31 Cri-du-chat syndrome |
| 758.32 Velo-cardio-facial syndrome |
| 758.33 Other microdeletions |
| 758.39 Other autosomal deletions |
| 758.4 Balanced autosomal translocation in normal individual |
| 758..5 Other conditions due to autosomal anomalies |
| 758.6 Gonadal dysgenesis |
| 758.7 Klinefelter’s syndrome |
| 758.8 Other conditions due to chromosome anomalies |
| 758.81 Other conditions due to sex chromosome anomalies |
| 758.89 Other conditions due to chromosome anomalies |
| 758.9 Conditions due to anomaly of unspecified chromosome |
